# Supplementary material
Source: publisher site journal article supplement (https://www.dovepress.com/article/246714)
Supplement: Supplementary file 1 [file get_supplementary_file.php]

**Supplementary materials**

**Cancer-derived transforming growth factor-β modulates tumor-associated macrophages in ampullary cancer**

Li-Chin Cheng, Ying-Jui Chao, Chih-Yang Wang, Nam Nhut Phan, Yi-Ling Chen, Tzu-Wen Wang, Hui-Ping Hsu, Yih-Jyh Lin, Yan-Shen Shan,Ming-Derg Lai

| **Supplementary Table 1.** Sequences of primers for reverse transcription-polymerase chain reaction. | | | |
| --- | --- | --- | --- |
| Gene | Sequences of primers | Amplicon length (bp) | Annealing temperature (°C) |
| *β-actin* | Sense: AGC GGG AAA TCG TGC GTG  Antisense: CAG GGT ACA TGG TGG TGG TGC C | 309 | 60 |
| *IL-10* | Sense: ATG CCC CAA GCT GAG AAC CAA GAC  Antisense: CCC AGA GCC CCA GAT CCG ATT TTG | 329 | 60 |
| *TGF-β* | Sense: GAC ATC AAC GGG TTC ACT ACC GG  Antisense: GAG GCA GAA GTT GGC ATG GTA GC | 267 | 60 |
| *TNF-α* | Sense: GGA CCT CTC TCT AAT CAG CCC TCT  Antisense: ACC TGG GAG TAG ATG AGG TAC AGG | 219 | 56 |
| *IL-1β* | Sense: GGG CCT CAA GGA AAA GAA TC  Antisense: TTC TGC TTG AGA GGT GCT GA | 205 | 54 |
| *CCL18* | Sense: TAC CTC CTG GCA GAT TCC AC  Antisense: CAG GCA TTC AGC TTC AGG TC | 168 | 52 |
| *OPN* | Sense: GCC GAG GTG ATA GTG TGG TT  Antisense: TGA AAT TCA TGG CTG TGG AA | 364 | 54 |
| *CD163* | Sense: GCC ATA GTG AGT GTG GGC ACA A  Antisense: TCA GTG TGG CTC AGA ATG GCC TC | 326 | 54 |
| *CCL22* | Sense: TAC AGA CTG CAC TCC TGG TTG TCC  Antisense: ATC CCT GAA GGT TAG CAA CAC CAC | 206 | 54 |

| **Supplementary Table 2.** Pathway maps in MetaCore analysis of the National Center for Biotechnology Information Gene Expression Omnibus GSE39409 dataset. | | | | |
| --- | --- | --- | --- | --- |
| Rank | Maps | *P* value | N | Genes in present study |
| 1 | [Cytoskeleton remodeling_Regulation of actin cytoskeleton organization by the kinase effectors of Rho GTPases](http://portal.genego.com/cgi/imagemap.cgi?id=551) | 1.458E-19 | 38 | MLCP (cat), BETA-PIX, RhoA, ROCK, WRCH-1, Actomyosin, MRCKalpha, PAK, Cofilin, non-muscle, Rac1-related, Cdc42 subfamily, Vinculin, MSN (moesin), ERM proteins, Destrin, F-Actin cytoskeleton, Spectrin, MRLC, SLC9A1, Arp2/3, PRK1, ARPC1B, RhoA-related, Myosin II, Cortactin, Caldesmon, CDC42, Actin cytoskeletal, Alpha-actinin, PAK1, RhoC, TC10, MyHC, LIMK, MLCK, Cofilin, Rac1, MRCK |
| 2 | [Inhibition of remyelination in multiple sclerosis: regulation of cytoskeleton proteins](http://portal.genego.com/cgi/imagemap.cgi?id=4455) | 2.821E-14 | 28 | MLCP (cat), Tubulin beta, RhoA, Myelin basic protein, MARCKS, Tubulin alpha, PCBP-1, ROCK2, PKC-alpha, alpha-V/beta-1 integrin, MRLC, Tubulin beta 4, Arp2/3, p190RhoGAP, FAK1, Myosin II, CDC42, WASP, Actin cytoskeletal, Fyn, PAK1, MELC, hnRNP A2, Fibronectin, WASF2, Cofilin, Rac1, Tubulin (in microtubules) |
| 3 | [Development_VEGF signaling via VEGFR2 - generic cascades](http://portal.genego.com/cgi/imagemap.cgi?id=533) | 3.216E-14 | 43 | COX-2 (PTGS2), MEK1(MAP2K1), RhoA, I-kB, Shc, COX-1 (PTGS1), p120GAP, Calcineurin A (catalytic), Calmodulin, PKC, GRB2, PI3K reg class IA, Vinculin, PKC-alpha, HSP27, H-Ras, IKK-beta, MEK3(MAP2K3), TCF7L2 (TCF4), ROCK1, c-Jun, eIF4E, ERK1/2, FAK1, Beta-catenin, VEGF-A, CDC42, Actin cytoskeletal, Fyn, c-Raf-1, SOS, PAK1, ERK2 (MAPK1), HSP90, MNK1, PDK (PDPK1), p38 MAPK, ERK1 (MAPK3), p90Rsk, PLAU (UPA), MLCK, Rac1, IP3 receptor |
| 4 | [IGF signaling in HCC](http://portal.genego.com/cgi/imagemap.cgi?id=3264) | 1.447E-13 | 30 | Junctin, MEK1(MAP2K1), Shc, PI3K reg class IA (p85), NOTCH1 receptor, PKC, GRB2, IRS-2, HIF1A, HES1, C/EBPbeta, EGFR, IGF-2, H-Ras, FOXO3A, c-Jun, ERK1/2, MMP-2, EGR1, VEGF-A, c-Raf-1, RKIP, SOS, SP1, IGF-2 receptor, PDK (PDPK1), HGF receptor (Met), Jagged1, TIMP1, IBP3 |
| 5 | [Oxidative stress_ROS-induced cellular signaling](http://portal.genego.com/cgi/imagemap.cgi?id=7586) | 1.751E-13 | 46 | GSTP1, Casein kinase II, alpha chains, NOTCH1 (NICD), TfR1, COX-2 (PTGS2), ELAVL1 (HuR), p38alpha (MAPK14), Thioredoxin, Chk2, GPX1, PKC, PTEN, SCD, HIF1A, HES1, FTL, IL-8, SRX1, HSP27, FTH1, IKK-beta, DLC1 (Dynein LC8a), ERK1/2, GRP75, GADD45 alpha, EGR1, VEGF-A, Cyclin D1, PKA-reg (cAMP-dependent), TXNIP (VDUP1), HIF-prolyl hydroxylase, HDAC1, Pin1, SAE2, Isoform p66 Shc, SP1, Glutaredoxin 1, p21, Cytochrome c, Catalase, NRF2, E2I, p38 MAPK, APEX, Carbonic anhydrase IX, NFKBIA |
| 6 | [Development_Regulation of cytoskeleton proteins in oligodendrocyte differentiation and myelination](http://portal.genego.com/cgi/imagemap.cgi?id=4890) | 2.347E-13 | 32 | MLCP (cat), Tubulin beta, RhoA, CNTN1 (F3), Myelin basic protein, Tubulin alpha, PCBP-1, MAP4, alpha-6/beta-1 integrin, ROCK2, N-WASP, MRLC, Tubulin beta 4, Arp2/3, p190RhoGAP, FAK1, Myosin II, Cortactin, CDC42, WASP, Actin cytoskeletal, Fyn, PAK1, PDGF-R-alpha, PDGF receptor, MELC, hnRNP A2, Gelsolin, WASF2, Cofilin, Rac1, Tubulin (in microtubules) |
| 7 | [Role of stellate cells in progression of pancreatic cancer](http://portal.genego.com/cgi/imagemap.cgi?id=3294) | 4.370E-13 | 32 | COL1A1, MEK1(MAP2K1), Shc, PI3K reg class IA (p85), RECK, MMP-13, GRB2, IL-8, TGF-beta receptor type II, EGFR, H-Ras, c-Jun, ERK1/2, MMP-2, FAK1, HB-EGF, Galectin-1, ACTA2, c-Raf-1, SOS, COL1A2, PDGF-R-alpha, PDGF receptor, OSF-2, SMAD2, PDK (PDPK1), Fibronectin, NFKBIA, Collagen I, TIMP1, TGF-beta receptor type I, Collagen III |
| 8 | [CHDI_Correlations from Discovery data_Causal network (positive)](http://portal.genego.com/cgi/imagemap.cgi?id=6626) | 4.385E-13 | 24 | STAT3, PI3K reg class IA (p85), gp130, GRB2, JAK1, Vinculin, Kalirin, SHP-2, Ephrin-B, N-WASP, Arp2/3, MMP-2, FAK1, alpha-2/beta-1 integrin, CDC42, Actin cytoskeletal, Collagen IV, Actin, Intersectin, LAMA3 (Epiligrin), CD47, STAT1, Rac1, Collagen III |
| 9 | [ErbB2-induced breast cancer cell invasion](http://portal.genego.com/cgi/imagemap.cgi?id=6362) | 5.418E-13 | 34 | I-kB, Shc, PI3K reg class IA (p85), MMP-13, Cofilin, non-muscle, GRB2, PKC-alpha, MMP-1, PDCD4, ETS1, NGAL, EGFR, H-Ras, MEK3(MAP2K3), ERK1/2, Arp2/3, MMP-2, FAK1, ErbB3, MEK1/2, VEGF-A, CDC42, Actin cytoskeletal, c-Raf-1, SOS, PAK1, PDK (PDPK1), p38 MAPK, WASF2, SLK, PLAU (UPA), Cofilin, Rac1, IP3 receptor |
| 10 | [NRF2 regulation of oxidative stress response](http://portal.genego.com/cgi/imagemap.cgi?id=2734) | 5.667E-13 | 30 | GSTP1, Casein kinase II, alpha chains, Ubiquitin, MEK1(MAP2K1), Casein kinase II, beta chain (Phosvitin), Thioredoxin, CBP, GPX2, CRM1, GSHB, PKC, SOD1, PI3K reg class IA, eIF2AK3, SMRT, BRG1, DJ-1, Actin cytoskeletal, Fyn, c-Raf-1, ENC1, ERK2 (MAPK1), GCL cat, MafF, PDK (PDPK1), PRDX1, TXNRD1, NRF2, NQO1, ERK1 (MAPK3) |
| 11 | [HGF signaling in colorectal cancer](http://portal.genego.com/cgi/imagemap.cgi?id=6555) | 6.637E-13 | 33 | COX-2 (PTGS2), E-cadherin, Shc, HPGD, GRB2, PI3K reg class IA, JunD, CD44, PTEN, SHP-2, EGFR, H-Ras, XIAP, TCF7L2 (TCF4), ERK1/2, MMP-2, FAK1, Beta-catenin, MEK1/2, VEGF-A, Actin cytoskeletal, Cyclin D1, c-Raf-1, Matriptase, SOS, TIMP2, HGF receptor (Met), ADAM10, LAMA3 (Epiligrin), JunD/Fra-2, TIMP1, Rac1, VIL2 (ezrin) |
| 12 | [Immune response_Oncostatin M signaling via MAPK](http://portal.genego.com/cgi/imagemap.cgi?id=2204) | 1.085E-12 | 24 | MEK1(MAP2K1), Shc, gp130, AP-1, MMP-13, GRB2, JAK1, MMP-1, C/EBPbeta, LDLR, SHP-2, H-Ras, MEK3(MAP2K3), c-Jun, ERK1/2, EGR1, c-Raf-1, SOS, ERK2 (MAPK1), p38 MAPK, ERK1 (MAPK3), TIMP1, STAT1, Rac1 |
| 13 | [ERBB family and HGF signaling in gastric cancer](http://portal.genego.com/cgi/imagemap.cgi?id=3118) | 4.369E-12 | 29 | STAT3, COX-2 (PTGS2), Shc, GRB2, PI3K reg class IA, HIF1A, IL-8, EGFR, H-Ras, MEK3(MAP2K3), TCF7L2 (TCF4), c-Jun, ERK1/2, ErbB3, HB-EGF, Beta-catenin, MEK1/2, EGR1, VEGF-A, Cyclin D1, c-Raf-1, SOS, ERK2 (MAPK1), SP1, PDK (PDPK1), HGF receptor (Met), p27KIP1, p38 MAPK, ERK1 (MAPK3) |
| 14 | [Role of Tissue factor-induced Thrombin signaling in cancerogenesis](http://portal.genego.com/cgi/imagemap.cgi?id=5016) | 7.536E-12 | 32 | MLCP (cat), MEK1(MAP2K1), RhoA, ROCK, G-protein alpha-12 family, MMP-13, PI3K reg class IA (p85-alpha), Calmodulin, PKC-alpha, IL-8, PAR2, EGFR, G-protein alpha-i family, IKK-beta, MRLC, LARG, c-Jun, ERK1/2, MMP-2, FAK1, VEGF-A, Actin cytoskeletal, c-Raf-1, ERK2 (MAPK1), G-protein alpha-q/11, Tissue factor, MELC, PDK (PDPK1), alpha-V/beta-5 integrin, ERK1 (MAPK3), MLCK, IP3 receptor |
| 15 | [Androgen receptor activation and downstream signaling in Prostate cancer](http://portal.genego.com/cgi/imagemap.cgi?id=7159) | 7.906E-12 | 44 | STAT3, MEK1(MAP2K1), E-cadherin, Shc, gp130, Rb protein, ADAM9, GRB2, PI3K reg class IA (p85-beta), JAK1, K-RAS, GCR, PTEN, NCOA3 (pCIP/SRC3), TMPRSS2, KLF5, IL-8, SHP-2, EGFR, N-Ras, H-Ras, Kallikrein 2, Versican, Caspase-2, Bcl-XL, SGK1, VEGF-A, Cyclin D1, c-Raf-1, SOS, c-FLIP, FEN1, ERK2 (MAPK1), Caveolin-1, APP, p21, SPRY1, PDK (PDPK1), NCOA2 (GRIP1/TIF2), ADAM10, ERK1 (MAPK3), Prosaposin, IBP3, VIL2 (ezrin) |
| 16 | [Cell adhesion_ECM remodeling](http://portal.genego.com/cgi/imagemap.cgi?id=717) | 8.034E-12 | 29 | MMP-13, TIMP3, CD44, SERPINE2, PLAT (TPA), MSN (moesin), MMP-1, IL-8, EGFR, IGF-2, Kallikrein 2, MMP-2, Versican, MMP-12, HB-EGF, Actin cytoskeletal, Collagen IV, TIMP2, Fibronectin, Kallikrein 1, Nidogen, Osteonectin, Flotillin-2, LAMA4, PLAU (UPA), Collagen I, TIMP1, VIL2 (ezrin), Collagen III |
| 17 | [Glucocorticoid-induced elevation of intraocular pressure as glaucoma risk factor](http://portal.genego.com/cgi/imagemap.cgi?id=7213) | 9.522E-12 | 31 | COX-2 (PTGS2), RhoA, ITGB1, ROCK, WNT5A, COL4A1, PI3K reg class IA (p85-alpha), GCR Beta, GCR, PLAT (TPA), MMP-1, Filamin B (TABP), Antileukoproteinase 1, EGFR, MMP-2, FAK1, Syndecan-4, CDC42, Actin cytoskeletal, Alpha-actinin, GCR Alpha, CLIM1, PAK1, Srp40, Collagen IV, HGF receptor (Met), Fibronectin, alpha-V/beta-5 integrin, MLCK, CD47, Rac1 |
| 18 | [Apoptosis and survival_NGF/ TrkA PI3K-mediated signaling](http://portal.genego.com/cgi/imagemap.cgi?id=652) | 1.450E-11 | 35 | MLCP (cat), BETA-PIX, RhoA, RAP-1A, Shc, ROCK, PI3K reg class IA (p85), MRCKalpha, PARD3, Calcineurin A (catalytic), Cofilin, non-muscle, Calmodulin, GRB2, Kalirin, MSN (moesin), N-WASP, H-Ras, Destrin, MRLC, FOXO3A, ERK1/2, Arp2/3, p190RhoGAP, KIDINS220, Myosin II, CDC42, Actin cytoskeletal, SOS, LIMK2, PAK1, PDK (PDPK1), ILK, Cofilin, Rac1, Tubulin (in microtubules) |
| 19 | [Immune response_Induction of the antigen presentation machinery by IFN-gamma](http://portal.genego.com/cgi/imagemap.cgi?id=2647) | 1.734E-11 | 28 | IFNGR1, Beta-2-microglobulin, CBP, HLA-DRB1, HLA-E, MHC class II, CD74, PSMB8(LMP7), HLA-B, NLRC5, JAK1, PSME2, Nucleophosmin, HLA-A, ASH2L, HLA-DMA, MHC class I, PSMB9, HLA-DPA1, HLA-F, IFNGR2, HLA-DRA1, HLA-C, Tapasin, Cathepsin S, HLA-DPB1, PSME1, STAT1 |
| 20 | [IGF family signaling in colorectal cancer](http://portal.genego.com/cgi/imagemap.cgi?id=6490) | 2.060E-11 | 30 | COX-2 (PTGS2), GIPC, I-kB, Shc, PI3K reg class IA (p85-alpha), GRB2, PTEN, IRS-2, HIF1A, IL-8, IGF-2, H-Ras, c-Jun, eIF4E, ERK1/2, Bcl-XL, MNK2(GPRK7), Beta-catenin, MEK1/2, VEGF-A, Cyclin D1, c-Raf-1, SOS, ERK2 (MAPK1), IGF-2 receptor, MNK1, ERK1 (MAPK3), IBP, MAT2A, IBP3 |
| 21 | [Cytoskeleton remodeling_Fibronectin-binding integrins in cell motility](http://portal.genego.com/cgi/imagemap.cgi?id=451) | 2.075E-11 | 21 | RhoA, ROCK, PI3K reg class IA (p85), ITGAV, Vinculin, N-WASP, Arp2/3, p190RhoGAP, FAK1, CDC42, Actin cytoskeletal, Fyn, Alpha-actinin, LIMK2, PAK1, IRAS, Caveolin-1, Fibronectin, ILK, Cofilin, Rac1 |
| 22 | [IL-6 signaling in multiple myeloma](http://portal.genego.com/cgi/imagemap.cgi?id=4920) | 3.744E-11 | 27 | STAT3, Cyclin D2, MEK1(MAP2K1), Shc, PI3K reg class IA (p85), gp130, Rb protein, GRB2, JAK1, K-RAS, CDK4, SHP-2, N-Ras, c-Jun, ERK1/2, Bcl-XL, VEGF-A, Cyclin D1, c-Raf-1, SOS, p21, Bcl-6, PDK (PDPK1), p27KIP1, Mcl-1, STAT1, CDK6 |
| 23 | [Cell adhesion_Integrin-mediated cell adhesion and migration](http://portal.genego.com/cgi/imagemap.cgi?id=450) | 4.362E-11 | 26 | MLCP (cat), RhoA, ROCK, GRB2, Vinculin, N-WASP, MRLC, ERK1/2, Arp2/3, p190RhoGAP, FAK1, alpha-2/beta-1 integrin, Actin cytoskeletal, Alpha-actinin, LIMK2, PAK1, ERK2 (MAPK1), Collagen IV, MELC, Fibronectin, MyHC, MYLK1, MLCK, Collagen I, Cofilin, Rac1 |
| 24 | [Signal transduction_PDGF signaling via MAPK cascades](http://portal.genego.com/cgi/imagemap.cgi?id=654) | 4.563E-11 | 31 | COX-2 (PTGS2), Shc, Osteopontin, AP-1, MMP-13, GRB2, JunD, SHP-2, HSP27, H-Ras, MEK3(MAP2K3), c-Jun, ERK1/2, MMP-2, FAK1, MEK1/2, EGR1, Cyclin D1, c-Raf-1, PDGF-R-alpha, ERK2 (MAPK1), SP1, p21, PDGF receptor, Tissue factor, p27KIP1, KLF4, p38 MAPK, GRB10, p90Rsk, Rac1 |
| 25 | [Role of metalloproteases and heparanase in progression of pancreatic cancer](http://portal.genego.com/cgi/imagemap.cgi?id=3239) | 4.965E-11 | 21 | MEK1(MAP2K1), Shc, GRB2, CD44, Alpha 1-antitrypsin, MMP-1, EGFR, ZO-1, CD44 soluble, H-Ras, MMP-2, CD44 (EXT), HB-EGF, Occludin, VEGF-A, c-Raf-1, SOS, Collagen IV, TIMP2, ERK1 (MAPK3), TIMP1 |
| 26 | [Regulation of degradation of deltaF508-CFTR in CF](http://portal.genego.com/cgi/imagemap.cgi?id=2639) | 5.574E-11 | 23 | Ubiquitin, RNF4, SEC61 complex, NPL4, UBE1, Dynein 1, cytoplasmic, heavy chain, HSC70, Dynein 1, cytoplasmic, light chains, Csp, Aha1, SUMO-2, HSP27, HSP105, UBE2J1, VCP, Hdj-2, HSP90, CHIP, HSP70, Dynein 1, cytoplasmic, intermediate chains, E2I, Derlin1, SUMO-3 |
| 27 | [Translation _Regulation of EIF2 activity](http://portal.genego.com/cgi/imagemap.cgi?id=497) | 5.574E-11 | 23 | Casein kinase II, alpha chains, MEK1(MAP2K1), Casein kinase II, beta chain (Phosvitin), Shc, eIF2, GRB2, PI3K reg class IA, eIF2AK3, IRS-2, PKR, PP1-cat, Insulin receptor, EGFR, H-Ras, PP1-cat alpha, DYRK1a, ERK1/2, Casein kinase I, c-Raf-1, SOS, eIF2S1, PDK (PDPK1), eIF2AK1 |
| 28 | [Chemotaxis_Lysophosphatidic acid signaling via GPCRs](http://portal.genego.com/cgi/imagemap.cgi?id=452) | 7.414E-11 | 47 | RhoA, E-cadherin, ROCK, PI3K reg class IA (p85), cPKC (conventional), G-protein alpha-12 family, AP-1, PAK, PKC, alpha-6/beta-1 integrin, Vinculin, DIA1, Tcf(Lef), IL-8, EGFR, G-protein alpha-i family, H-Ras, F-Actin cytoskeleton, LARG, ROCK1, c-Jun, MKL2, ERK1/2, Cyr61, PRK1, FAK1, HB-EGF, Bcl-XL, Beta-catenin, MEK1/2, EGR1, G-protein beta/gamma, Rho GTPase, CDC42, Actin cytoskeletal, N-CoR, c-Raf-1, G-protein alpha-q/11, p21, PDK (PDPK1), LIMK, p38 MAPK, Cofilin, Rac1, IP3 receptor, YAP1 (YAp65), G-protein gamma 12 |
| 29 | [Cytoskeleton remodeling_Integrin outside-in signaling](http://portal.genego.com/cgi/imagemap.cgi?id=664) | 8.082E-11 | 26 | MEK1(MAP2K1), GRB2, NCK2, Vinculin, PINCH, Tcf(Lef), H-Ras, c-Jun, ERK1/2, Arp2/3, FAK1, alpha-2/beta-1 integrin, Beta-catenin, WASP, Actin cytoskeletal, Cyclin D1, Alpha-actinin, c-Raf-1, SOS, PAK1, Collagen IV, Fibronectin, ILK, Collagen I, Rac1, WIRE |
| 30 | [Stellate cells activation and liver fibrosis](http://portal.genego.com/cgi/imagemap.cgi?id=2722) | 9.007E-11 | 32 | COL1A1, MEK1(MAP2K1), Biglycan, I-kB, Shc, PI3K reg class IA (p85), GRB2, MyD88, Tcf(Lef), TGF-beta receptor type II, H-Ras, KLF6, MMP-2, IL-1RI, Beta-catenin, ACTA2, Cyclin D1, IRAK1/2, c-Raf-1, SOS, COL1A2, PDGF-R-alpha, ERK2 (MAPK1), SP1, PDGF receptor, TNF-R1, SMAD2, Dsh, ERK1 (MAPK3), Frizzled, TIMP1, TGF-beta receptor type I |
| 31 | [Cytoskeleton remodeling_Regulation of actin cytoskeleton nucleation and polymerization by Rho GTPases](http://portal.genego.com/cgi/imagemap.cgi?id=714) | 9.391E-11 | 25 | RhoA, RhoD, DRF, MENA, Profilin, Rac1-related, Cdc42 subfamily, DIA1, N-WASP, F-Actin cytoskeleton, Arp2/3, RhoA-related, CDC42, WASP, Actin cytoskeletal, IQGAP1, WASF subunit, RhoC, WRC, TC10, Gelsolin, WASF2, CYFIP1, FNBP1L, Rac1 |
| 32 | [Cell adhesion_Role of tetraspanins in the integrin-mediated cell adhesion](http://portal.genego.com/cgi/imagemap.cgi?id=2023) | 1.173E-10 | 22 | RhoA, ITGB1, ROCK, alpha-6/beta-1 integrin, CD81, Vinculin, PKC-alpha, N-WASP, Arp2/3, FAK1, CDC42, WASP, Actin cytoskeletal, PAK1, CD9, CD53, Fibronectin, CD63, Actin, Cofilin, Rac1, VIL2 (ezrin) |
| 33 | [Cell cycle_Influence of Ras and Rho proteins on G1/S Transition](http://portal.genego.com/cgi/imagemap.cgi?id=4583) | 1.200E-10 | 27 | STAT3, MLCP (cat), MEK1(MAP2K1), RhoA, Rb protein, PI3K reg class IA, ROCK2, CDK4, DIA1, H-Ras, Tob1, MRLC, ERK1/2, FAK1, CDC42, Cyclin D1, c-Raf-1, LIMK2, PAK1, p21, PDK (PDPK1), RalA, p27KIP1, NFKBIA, MLCK, Rac1, CDK6 |
| 34 | [Proliferative action of Gastrin in gastric cancer](http://portal.genego.com/cgi/imagemap.cgi?id=3140) | 1.200E-10 | 27 | MEK1(MAP2K1), E-cadherin, Shc, PI3K reg class IA (p85), cPKC (conventional), PKC, GRB2, PKC-alpha, EGFR, H-Ras, TCF7L2 (TCF4), ERK1/2, SP3, FAK1, HB-EGF, Beta-catenin, G-protein alpha-q, Cyclin D1, c-Raf-1, SOS, PAK1, G-protein alpha-q/11, SP1, PDK (PDPK1), ICRF, p90Rsk, IP3 receptor |
| 35 | [CHDI_Correlations from Replication data_Cytoskeleton and adhesion module](http://portal.genego.com/cgi/imagemap.cgi?id=6628) | 1.611E-10 | 30 | MLCP (cat), RhoA, RAP-1A, ROCK, MHC class II, GRB2, Vinculin, Ephrin-B, MRLC, Arp2/3, FAK1, RASSF5, CrkL, G-protein beta/gamma, CDC42, WASP, Actin cytoskeletal, Fyn, Alpha-actinin, PAK1, Collagen IV, MELC, Fibronectin, MyHC, Intersectin, PLAU (UPA), ILK, CXCR4, Rac1, IP3 receptor |
| 36 | [Cytoskeleton remodeling_Reverse signaling by Ephrin-B](http://portal.genego.com/cgi/imagemap.cgi?id=529) | 2.326E-10 | 20 | Tubulin alpha, NCK2, F-Actin, PINCH, Ephrin-B, N-WASP, G-protein alpha-i family, H-Ras, Arp2/3, FAK1, Beta-catenin, G-protein beta/gamma, Actin cytoskeletal, c-Raf-1, SOS, PAK1, ILK, CXCR4, WIRE, Tubulin (in microtubules) |
| 37 | [Role of Tissue factor in cancer independent of coagulation protease signaling](http://portal.genego.com/cgi/imagemap.cgi?id=5013) | 2.460E-10 | 21 | MEK1(MAP2K1), Shc, PI3K reg class IA (p85-alpha), GRB2, alpha-6/beta-1 integrin, PKC-alpha, H-Ras, ERK1/2, FAK1, YES, VEGF-A, CDC42, Actin cytoskeletal, c-Raf-1, SOS, PAK1, ERK2 (MAPK1), Tissue factor, p38 MAPK, ERK1 (MAPK3), Rac1 |
| 38 | [Main pathways of Schwann cells transformation in neurofibromatosis type 1](http://portal.genego.com/cgi/imagemap.cgi?id=6947) | 2.700E-10 | 34 | MEK1(MAP2K1), ITGB1, Myelin basic protein, PI3K reg class IA (p85), AP-1, RHEB2, Calmodulin, K-RAS, PTEN, HIF1A, RPS6, S100B, EGFR, N-Ras, H-Ras, TPT1, ERK1/2, FAK1, ErbB3, Bcl-XL, Beta-catenin, MEK1/2, BRD4, VEGF-A, CDC42, Cyclin D1, c-Raf-1, PAK1, PDGF receptor, PDK (PDPK1), p38 MAPK, SOX9, CXCR4, IP3 receptor |
| 39 | [Development_Negative regulation of WNT/Beta-catenin signaling in the cytoplasm](http://portal.genego.com/cgi/imagemap.cgi?id=2331) | 2.700E-10 | 34 | ELAVL1 (HuR), RACK1, E-cadherin, HECTD1, Casein kinase I delta, WNT5A, NOTCH1 receptor, SIAH1, PKC-alpha, HIPK2, DP1, Tcf(Lef), WNT, PP1-cat, HUWE1, Alpha-1 catenin, Beclin 1, Ankyrin-G, LATS2, Beta-catenin, G-protein beta/gamma, WDR26, Cyclin D1, PP2A catalytic, CXXC5, Dsh, A20, Casein kinase I alpha, Frizzled, YAP1/TAZ, Rac1, YAP1 (YAp65), G-protein alpha-13, CDK6 |
| 40 | [Development_Gastrin in cell growth and proliferation](http://portal.genego.com/cgi/imagemap.cgi?id=3134) | 3.470E-10 | 29 | STAT3, MEK1(MAP2K1), p38alpha (MAPK14), E-cadherin, Shc, PI3K reg class IA (p85), AP-1, PI3K reg class IA (p85-alpha), GRB2, PKC-alpha, EGFR, H-Ras, TCF7L2 (TCF4), c-Jun, ERK1/2, FAK1, HB-EGF, Beta-catenin, G-protein alpha-q, Cyclin D1, c-Raf-1, SOS, PAK1, ERK2 (MAPK1), G-protein alpha-q/11, PDK (PDPK1), ERK1 (MAPK3), p90Rsk, IP3 receptor |
| 41 | [Mechanisms of resistance to EGFR inhibitors in lung cancer](http://portal.genego.com/cgi/imagemap.cgi?id=5330) | 3.768E-10 | 24 | MEK1(MAP2K1), E-cadherin, Shc, Ep-CAM, PI3K reg class IA (p85), GRB2, TACSTD2 (TROP2), K-RAS, PTEN, EGFR, H-Ras, Claudin-7, ErbB3, CIN85, Beta-catenin, c-Raf-1, SOS, ERK2 (MAPK1), HSP90, PDK (PDPK1), HGF receptor (Met), Fibronectin, Vimentin, ERK1 (MAPK3) |
| 42 | [Apoptosis and survival_BAD phosphorylation](http://portal.genego.com/cgi/imagemap.cgi?id=661) | 4.349E-10 | 23 | MEK1(MAP2K1), Shc, Calcineurin A (catalytic), G-protein alpha-s, GRB2, PI3K reg class IA, EGFR, H-Ras, PP1-cat alpha, ERK1/2, Beclin 1, 14-3-3, Bcl-XL, G-protein beta/gamma, PKA-reg (cAMP-dependent), c-Raf-1, SOS, PP2C, PP2A catalytic, Cytochrome c, PDK (PDPK1), PKA-cat (cAMP-dependent), p90Rsk |
| 43 | [FAK1 signaling in melanoma](http://portal.genego.com/cgi/imagemap.cgi?id=6371) | 4.349E-10 | 23 | RhoA, ITGB1, Shc, Syntenin 1, GRB2, ROCK2, PKC-alpha, N-Ras, ERK1/2, MMP-2, FAK1, MEK1/2, VEGF-A, Actin cytoskeletal, SOS, Caveolin-1, TIMP2, RhoC, Fibronectin, WASF2, NFKBIA, PLAU (UPA), Rac1 |
| 44 | [Development_TGF-beta receptor signaling](http://portal.genego.com/cgi/imagemap.cgi?id=475) | 4.518E-10 | 26 | MEK1(MAP2K1), Shc, CBP, Importin (karyopherin)-beta, TGF-beta receptor type II, H-Ras, XIAP, IKK-beta, MEK3(MAP2K3), Sno-N, eIF4E, ERK1/2, TSC-22, FKBP12, c-Raf-1, SOS, SP1, Caveolin-1, p21, MNK1, SMAD2, TIEG1, YY1, p38 MAPK, NFKBIA, TGF-beta receptor type I |
| 45 | [FGF2 signaling in melanoma](http://portal.genego.com/cgi/imagemap.cgi?id=6370) | 4.838E-10 | 22 | STAT3, RhoA, Shc, Syndecan-1, GRB2, MMP-1, N-Ras, ERK1/2, MMP-2, Syndecan-4, YES, MEK1/2, VEGF-A, CDC42, SOS, Caveolin-1, Collagen IV, p21, Fibronectin, p38 MAPK, Collagen I, Rac1 |
| 46 | [Development_TGF-beta-dependent induction of EMT via RhoA, PI3K and ILK](http://portal.genego.com/cgi/imagemap.cgi?id=2995) | 6.853E-10 | 24 | RhoA, E-cadherin, I-kB, PI3K reg class IA (p85), PINCH, TGF-beta receptor type II, ZO-1, H-Ras, ROCK1, MKL2, Occludin, Beta-catenin, Caldesmon, ACTA2, Tropomyosin-1, LIMK2, PDK (PDPK1), Fibronectin, Vimentin, Actin, ILK, ACTB, Cofilin, TGF-beta receptor type I |
| 47 | [Transport_Clathrin-coated vesicle cycle](http://portal.genego.com/cgi/imagemap.cgi?id=2640) | 7.341E-10 | 31 | Rab-4, Syntaxin 7, NSF, Rab-5A, RABGEF1, Rab-7, Myosin VI, SAR1, Rab-11A, VAMP8, Endophilin B1, VAMP7, Myosin I, Syntaxin 12, Rab11-FIP1, Rab-8, GDI2, GOS-28, Actin cytoskeletal, GCC2, Eps15, SAR1A, Clathrin, PICALM, SNX9, Syntaxin 16, ARF1, RABGDIA, Myosin Vb, Actin, Clathrin heavy chain |
| 48 | [EGFR family signaling in pancreatic cancer](http://portal.genego.com/cgi/imagemap.cgi?id=3128) | 8.009E-10 | 32 | STAT3, COX-2 (PTGS2), MEK1(MAP2K1), RhoA, I-kB, Shc, PI3K reg class IA (p85), Rb protein, GRB2, CDK4, p22-phox, EGFR, N-Ras, H-Ras, c-Jun, ERK1/2, MMP-2, ErbB3, HB-EGF, Bcl-XL, VEGF-A, Cyclin D1, c-Raf-1, SOS, PAK1, SP1, p21, PDK (PDPK1), p27KIP1, p38 MAPK, PLAU (UPA), Rac1 |
| 49 | [Effect of H. pylori infection on gastric epithelial cells motility](http://portal.genego.com/cgi/imagemap.cgi?id=3119) | 8.136E-10 | 23 | E-cadherin, ITGB1, Vinculin, PKC-alpha, SHP-2, ZO-1, Connexin 43, ERK1/2, Arp2/3, FAK1, CrkL, Occludin, Beta-catenin, Cortactin, Actin cytoskeletal, Alpha-actinin, PAK1, Csk, JAM1, Actin, Alpha-catenin, Rac1, VIL2 (ezrin) |
| 50 | [IGF-1 signaling in multiple myeloma](http://portal.genego.com/cgi/imagemap.cgi?id=5711) | 9.785E-10 | 25 | RhoA, I-kB, ITGB1, Shc, c-IAP2, GRB2, PI3K reg class IA, PTEN, IRS-2, HIF1A, H-Ras, XIAP, FOXO3A, ERK1/2, FAK1, MEK1/2, VEGF-A, CDC42, c-FLIP(Long), c-Raf-1, SOS, ERK2 (MAPK1), PDK (PDPK1), Fibronectin, ERK1 (MAPK3) |
| 51 | [CCR7 signaling pathways in dendritic cells in allergic contact dermatitis](http://portal.genego.com/cgi/imagemap.cgi?id=5248) | 9.890E-10 | 27 | MEK1(MAP2K1), RhoA, RAP-1A, Shc, ROCK, Profilin, GRB2, G-protein alpha-i family, H-Ras, ERK1/2, Arp2/3, RASSF5, Myosin II, G-protein beta/gamma, CDC42, WASP, Actin cytoskeletal, c-Raf-1, SOS, LIMK2, PAK1, PDK (PDPK1), Fibronectin, p38 MAPK, Cofilin, Rac1, IP3 receptor |
| 52 | [Signal transduction_Angiotensin II signaling via Beta-arrestin](http://portal.genego.com/cgi/imagemap.cgi?id=547) | 9.890E-10 | 27 | MLCP (cat), MEK1(MAP2K1), Casein kinase II, beta chain (Phosvitin), RhoA, ROCK, EGFR, ASK1 (MAP3K5), SET, MRLC, eIF4E, ERK1/2, 14-3-3, ARF6, Bcl-XL, c-Raf-1, DGK, Clathrin, PP2A catalytic, MNK1, Casein kinase II, alpha' chain (CSNK2A2), MYLK1, p27KIP1, Clathrin heavy chain, p90Rsk, MLCK, Cofilin, p23 co-chaperone |
| 53 | [Development_TGF-beta-dependent induction of EMT via MAPK](http://portal.genego.com/cgi/imagemap.cgi?id=2997) | 1.218E-09 | 24 | MEK1(MAP2K1), p38alpha (MAPK14), E-cadherin, ITGB1, Shc, AP-1, GRB2, PTEN, alpha-V/beta-1 integrin, TGF-beta receptor type II, H-Ras, MEK3(MAP2K3), c-Jun, ERK1/2, MMP-2, FAK1, Occludin, c-Raf-1, SOS, Fibronectin, Vimentin, p38 MAPK, Rac1, TGF-beta receptor type I |
| 54 | [Development_The role of GDNF ligand family/ RET receptor in cell survival, growth and proliferation](http://portal.genego.com/cgi/imagemap.cgi?id=495) | 1.285E-09 | 36 | STAT3, RhoA, RAP-1A, p38alpha (MAPK14), ITGB1, Shc, ROCK, PI3K reg class IA (p85), Calmodulin, GRB2, HIF1A, SHP-2, N-Ras, H-Ras, XIAP, F-Actin cytoskeleton, IKK-beta, c-Jun, ERK1/2, FAK1, Bcl-XL, MEK1/2, EGR1, VEGF-A, CDC42, p90RSK2(RPS6KA3), Cyclin D1, c-Raf-1, SOS, c-FLIP, PDK (PDPK1), ARTN, NFKBIA, Cofilin, Rac1, IP3 receptor |
| 55 | [Translation_Regulation of EIF4F activity](http://portal.genego.com/cgi/imagemap.cgi?id=496) | 1.294E-09 | 26 | MEK1(MAP2K1), Shc, RHEB2, GRB2, PI3K reg class IA, IGBP1, eIF4G2, TGF-beta receptor type II, EGFR, H-Ras, MEK3(MAP2K3), eIF4A, eIF4E, ERK1/2, eIF4B, eIF4H, CDC42, c-Raf-1, SOS, PP2A catalytic, PAK1, MNK1, PDK (PDPK1), p38 MAPK, Rac1, TGF-beta receptor type I |
| 56 | [Immune response_Antigen presentation by MHC class I, classical pathway](http://portal.genego.com/cgi/imagemap.cgi?id=2100) | 1.294E-09 | 26 | MHC Class I alpha chain, PDIA3, Beta-2-microglobulin, MIC2, UGCGL1, PSMB8(LMP7), PSME2, NPEPPS, Nardilysin, Endoplasmin, Calreticulin, PSMB2, PSMB1, PSMB5, MHC class I, PSMB9, Calnexin, HSP90 alpha, PA28 (11S regulator), Sec23, CHIP, Tapasin, HSP70, BCAP31, TCP1, PSME1 |
| 57 | [TGF-beta signaling via kinase cascades in breast cancer](http://portal.genego.com/cgi/imagemap.cgi?id=6520) | 1.609E-09 | 27 | COX-2 (PTGS2), Ubiquitin, MEK1(MAP2K1), p38alpha (MAPK14), ITGB1, Shc, AP-1, MMP-13, ITGAV, GRB2, IL-8, TGF-beta receptor type II, EGFR, XIAP, IKK-beta, MEK3(MAP2K3), c-Jun, ERK1/2, MMP-2, FAK1, ErbB3, TIMP2, p38 MAPK, NFKBIA, Rac1, TGF-beta receptor type I, TAB3 |
| 58 | [Cytoskeleton remodeling_Role of PKA in cytoskeleton reorganisation](http://portal.genego.com/cgi/imagemap.cgi?id=543) | 1.757E-09 | 22 | MLCP (cat), BETA-PIX, RhoA, 14-3-3 beta/alpha, ROCK, LBC, G-protein alpha-s, Calmodulin, F-Actin cytoskeleton, G-protein beta/gamma, CDC42, Actin cytoskeletal, PKA-reg (cAMP-dependent), LASP1, PAK1, MELC, Fodrin (spectrin), PKA-cat (cAMP-dependent), MLCK, Cofilin, Rac1, IP3 receptor |
| 59 | [CHDI_DEGs from Replication data_Causal network](http://portal.genego.com/cgi/imagemap.cgi?id=6624) | 1.846E-09 | 33 | MEK1(MAP2K1), RhoA, I-kB, Shc, CBP, Calcineurin A (catalytic), Calmodulin, ADAM9, PKC, GRB2, PTEN, WNT, PP1-cat, H-Ras, TCF7L2 (TCF4), c-Jun, ERK1/2, FAK1, alpha-2/beta-1 integrin, Beta-catenin, EGR1, CtBP, G-protein alpha-q, c-Raf-1, SOS, SP1, APP, Dsh, LPP3, ILK, Frizzled, Collagen I, IP3 receptor |
| 60 | [Cell adhesion_Cadherin-mediated cell adhesion](http://portal.genego.com/cgi/imagemap.cgi?id=2122) | 1.940E-09 | 17 | PTPRF (LAR), E-cadherin, AF-6, SHP-2, N-WASP, DEP-1, Arp2/3, FAK1, Beta-catenin, Cortactin, CDC42, Actin cytoskeletal, Fyn, Plakoglobin, HGF receptor (Met), Actin, Alpha-catenin |
| 61 | [Cell adhesion_Histamine H1 receptor signaling in the interruption of cell barrier integrity](http://portal.genego.com/cgi/imagemap.cgi?id=2435) | 2.640E-09 | 23 | MLCP (cat), RhoA, E-cadherin, ROCK, Calmodulin, Vinculin, PKC-alpha, ZO-1, MRLC, FAK1, Occludin, Myosin II, Beta-catenin, G-protein beta/gamma, Actin cytoskeletal, Alpha-actinin, LIMK2, G-protein alpha-q/11, MELC, Alpha-catenin, MLCK, Cofilin, IP3 receptor |
| 62 | [Th2 cytokine- and TNF-alpha-induced profibrotic response in asthmatic airway fibroblasts/ myofibroblasts](http://portal.genego.com/cgi/imagemap.cgi?id=6321) | 2.797E-09 | 25 | COL1A1, COX-2 (PTGS2), Biglycan, COX-1 (PTGS1), AP-1, GRB2, Decorin, FAN, MMP-1, ETS1, c-Jun, ERK1/2, MMP-2, MEK1/2, ACTA2, c-Raf-1, COL1A2, STAT6, PDGF-R-alpha, SP1, TNF-R1, p38 MAPK, Collagen I, TIMP1, Collagen III |
| 63 | [Development_EGFR signaling pathway](http://portal.genego.com/cgi/imagemap.cgi?id=443) | 3.575E-09 | 30 | STAT3, MEK1(MAP2K1), p38alpha (MAPK14), I-kB, Shc, PI3K reg class IA (p85), p120GAP, PARP-1, GRB2, JAK1, PKC-alpha, EGFR, H-Ras, IKK-beta, c-Jun, ERK1/2, MKP-1, MMP-2, FAK1, HB-EGF, c-Raf-1, SOS, PAK1, ERK2 (MAPK1), PDK (PDPK1), p38 MAPK, ERK1 (MAPK3), ILK, STAT1, Rac1 |
| 64 | [Signal transduction_Soluble CXCL16 signaling](http://portal.genego.com/cgi/imagemap.cgi?id=7034) | 3.615E-09 | 24 | STAT3, RhoA, I-kB, ROCK, Osteopontin, ARHGEF2, RHEB2, CD44, HIF1A, MMP-1, IL-8, G-protein alpha-i family, F-Actin cytoskeleton, IKK-beta, ERK1/2, MMP-2, MEK1/2, G-protein beta/gamma, VEGF-A, c-Raf-1, CXCL16, PDK (PDPK1), p38 MAPK, Cofilin |
| 65 | [Cell adhesion_PLAU signaling](http://portal.genego.com/cgi/imagemap.cgi?id=677) | 3.796E-09 | 21 | Casein kinase II, alpha chains, MEK1(MAP2K1), Casein kinase II, beta chain (Phosvitin), Shc, Nucleolin, gp130, GRB2, PI3K reg class IA, JAK1, SERPINE2, PLAT (TPA), EGFR, H-Ras, ERK1/2, FAK1, c-Raf-1, SOS, HGF receptor (Met), PLAU (UPA), ILK, STAT1 |
| 66 | [HBV signaling via protein kinases leading to HCC](http://portal.genego.com/cgi/imagemap.cgi?id=3169) | 4.328E-09 | 20 | MEK1(MAP2K1), Shc, cPKC (conventional), AP-1, PKC, GRB2, JAK1, PKC-alpha, NCOA6 (TRBP), IGF-2, H-Ras, c-Jun, ERK1/2, FAK1, JAB1, c-Raf-1, SOS, Pin1, ERK2 (MAPK1), SP1 |
| 67 | [EGFR signaling in Prostate Cancer](http://portal.genego.com/cgi/imagemap.cgi?id=3201) | 4.595E-09 | 23 | STAT3, MEK1(MAP2K1), Shc, PI3K reg class IA (p85), gp130, NCOA4 (ARA70), GRB2, K-RAS, EGFR, N-Ras, H-Ras, ERK1/2, ErbB3, HB-EGF, c-Raf-1, SOS, ERK2 (MAPK1), Caveolin-1, PDK (PDPK1), NCOA2 (GRIP1/TIF2), p27KIP1, ERK1 (MAPK3), NFKBIA |
| 68 | [TGF-beta-induced fibroblast/ myofibroblast migration and extracellular matrix production in asthmatic airways](http://portal.genego.com/cgi/imagemap.cgi?id=6320) | 4.608E-09 | 28 | COL1A1, Biglycan, ITGB1, AP-1, COL4A1, MMP-13, TIMP3, ITGA2, Decorin, MMP-1, TGF-beta receptor type II, H-Ras, c-Jun, ERK1/2, MMP-2, COL1A2, COL5A1, SP1, Collagen IV, TIMP2, SMAD2, Fibronectin, p38 MAPK, Collagen I, TIMP1, TGF-beta receptor type I, Collagen III, Thrombospondin 2 |
| 69 | [LRRK2 in neurons in Parkinson's disease](http://portal.genego.com/cgi/imagemap.cgi?id=6311) | 4.712E-09 | 19 | Ubiquitin, NSF, MSN (moesin), ERK1/2, 14-3-3, MEK1/2, Actin cytoskeletal, MARKK, Actin cytoplasmic 2, PAK1, HSP90, CHIP, Clathrin heavy chain, PKA-cat (cAMP-dependent), ACTB, Rac1, eEF1A, Tubulin (in microtubules), VIL2 (ezrin) |
| 70 | [Immune response_Sublytic effects of membrane attack complex](http://portal.genego.com/cgi/imagemap.cgi?id=459) | 5.028E-09 | 29 | RhoA, GRP78, ARHGEF2, PKC, GRB2, eIF2AK3, C/EBPbeta, HSP27, EGFR, Endoplasmin, G-protein alpha-i family, H-Ras, MEK3(MAP2K3), ERK1/2, GRP75, Bcl-XL, MEK1/2, G-protein beta/gamma, Actin cytoskeletal, c-FLIP(Long), c-Raf-1, MCU, SOS, eIF2S1, MNK1, Pnpla8, Caspase-8, p38 MAPK, IP3 receptor |
| 71 | [Cytoskeleton remodeling_Hyaluronic acid/ CD44 signaling pathways](http://portal.genego.com/cgi/imagemap.cgi?id=7054) | 5.724E-09 | 22 | RhoA, ROCK, PRK2, Calmodulin, GRB2, CD44, MSN (moesin), H-Ras, LARG, ERK1/2, Cortactin, MEK1/2, CDC42, Actin cytoskeletal, Fyn, c-Raf-1, SOS, HGF receptor (Met), Actin, MLCK, Rac1, VIL2 (ezrin) |
| 72 | [Development_IGF-1 receptor signaling](http://portal.genego.com/cgi/imagemap.cgi?id=540) | 6.049E-09 | 24 | MEK1(MAP2K1), 14-3-3 beta/alpha, I-kB, Shc, 14-3-3 epsilon, GRB2, PI3K reg class IA, IRS-2, RPS6, ASK1 (MAP3K5), IGF-2, H-Ras, 14-3-3 zeta/delta, FOXO3A, eIF4E, ERK1/2, Cyclin D, Bcl-XL, MNK2(GPRK7), c-Raf-1, SOS, MNK1, PDK (PDPK1), p90Rsk |
| 73 | [Stem cells_Pancreatic cancer stem cells in tumor metastasis](http://portal.genego.com/cgi/imagemap.cgi?id=3161) | 6.958E-09 | 21 | MLCP (cat), RhoA, ROCK, CD133, Calmodulin, G-protein alpha-i family, F-Actin cytoskeleton, MRLC, LARG, FAK1, Myosin II, G-protein beta/gamma, CDC42, Fyn, MELC, MyHC, MLCK, CXCR4, Rac1, IP3 receptor, G-protein alpha-13 |
| 74 | [EGF- and HGF-dependent stimulation of metastasis in gastric cancer](http://portal.genego.com/cgi/imagemap.cgi?id=3193) | 7.524E-09 | 15 | MEK1(MAP2K1), RhoA, E-cadherin, Shc, GRB2, HIF1A, EGFR, H-Ras, ERK1/2, FAK1, c-Raf-1, SOS, SP1, HGF receptor (Met), PLAU (UPA) |
| 75 | [Development_Negative regulation of WNT/Beta-catenin signaling in the nucleus](http://portal.genego.com/cgi/imagemap.cgi?id=2332) | 7.633E-09 | 34 | NF-AT5, ZNF703, KDM2, Casein kinase I delta, WNT5A, Calcineurin A (catalytic), NARF, HBP1, Tcf(Lef), WNT, Alpha-1 catenin, TCF7L2 (TCF4), FOXO3A, GPX4, 14-3-3, LATS2, Beta-catenin, P15RS, CtBP, VEGF-A, TRIM33, TBLR1, HDAC1, TLE, Plakoglobin, PJA2, Kaiso, Nitrilase 1, Dsh, KLF4, SOX9, TCF7 (TCF1), Frizzled, Histone H1 |
| 76 | [Immune response _CCR3 signaling in eosinophils](http://portal.genego.com/cgi/imagemap.cgi?id=736) | 8.019E-09 | 31 | MLCP (cat), Profilin I, MEK1(MAP2K1), RhoA, ROCK, Profilin, Calmodulin, ROCK2, PKC-alpha, p22-phox, DIA1, G-protein alpha-i family, H-Ras, MRLC, Arp2/3, Myosin II, G-protein beta/gamma, WASP, Actin cytoskeletal, c-Raf-1, LIMK2, PAK1, ERK2 (MAPK1), MELC, PDK (PDPK1), MyHC, p38 MAPK, MLCK, Cofilin, Rac1, IP3 receptor |
| 77 | [FGFR3 signaling in multiple myeloma](http://portal.genego.com/cgi/imagemap.cgi?id=4833) | 8.203E-09 | 20 | STAT3, MEK1(MAP2K1), Shc, PI3K reg class IA (p85-alpha), GRB2, PI3K reg class IA (p85-beta), K-RAS, N-Ras, H-Ras, ERK1/2, Bcl-XL, VEGF-A, p90RSK2(RPS6KA3), c-Raf-1, SOS, ERK2 (MAPK1), PDK (PDPK1), Mcl-1, ERK1 (MAPK3), STAT1 |
| 78 | [Development_Beta-adrenergic receptors transactivation of EGFR](http://portal.genego.com/cgi/imagemap.cgi?id=2433) | 8.203E-09 | 20 | MEK1(MAP2K1), Shc, AP-1, RHEB2, GRB2, PI3K reg class IA, CD44, EGFR, G-protein alpha-i family, H-Ras, c-Jun, ERK1/2, HB-EGF, G-protein beta/gamma, c-Raf-1, SOS, PP2A catalytic, ERK2 (MAPK1), MYLK1, ERK1 (MAPK3) |
| 79 | [Development_Ligand-independent activation of ESR1 and ESR2](http://portal.genego.com/cgi/imagemap.cgi?id=2210) | 9.966E-09 | 22 | MEK1(MAP2K1), Shc, CBP, G-protein alpha-s, GRB2, PI3K reg class IA, NCOA3 (pCIP/SRC3), EGFR, H-Ras, ERK1/2, ErbB3, Cyclin D1, PKA-reg (cAMP-dependent), c-Raf-1, SOS, ERK2 (MAPK1), Caveolin-1, TFF1, PDK (PDPK1), NCOA2 (GRIP1/TIF2), ERK1 (MAPK3), PKA-cat (cAMP-dependent) |
| 80 | [Immune response_Neurotensin-induced activation of IL-8 in colonocytes](http://portal.genego.com/cgi/imagemap.cgi?id=722) | 1.242E-08 | 21 | MEK1(MAP2K1), I-kB, Shc, Calmodulin, GRB2, PKC-alpha, IL-8, G-protein alpha-i family, H-Ras, IKK-beta, G-protein alpha-11, G-protein beta/gamma, CDC42, G-protein alpha-q, c-Raf-1, SOS, PAK1, ERK2 (MAPK1), ERK1 (MAPK3), Rac1, IP3 receptor |
| 81 | [Main growth factor signaling cascades in multiple myeloma cells](http://portal.genego.com/cgi/imagemap.cgi?id=2507) | 1.242E-08 | 21 | STAT3, MEK1(MAP2K1), I-kB, Shc, PI3K reg class IA (p85), PI3K reg class IA (p85-alpha), GRB2, PI3K reg class IA (p85-beta), PI3K reg class IA, K-RAS, PTEN, IRS-2, HIF1A, N-Ras, H-Ras, VEGF-A, c-Raf-1, SOS, ERK2 (MAPK1), PDK (PDPK1), ERK1 (MAPK3) |
| 82 | [Transcription_HIF-1 targets](http://portal.genego.com/cgi/imagemap.cgi?id=448) | 1.391E-08 | 35 | G3P2, TfR1, ID2, NIX, Adipophilin, ALDOA, F263, Nucleophosmin, PLGF, HXK2, HIF1A, HXK1, P4HA2, REDD1, SLC9A1, MMP-2, GPI, Galectin-1, VEGF-A, P4HA1, Cyclin G2, ENO1, p21, LDHA, MGF, DEC1 (Stra13), HGF receptor (Met), MSH6, Mcl-1, Carbonic anhydrase IX, PGK1, CXCR4, AK3, PKM2, IBP3 |
| 83 | [HBV mediates angiogenesis in HCC](http://portal.genego.com/cgi/imagemap.cgi?id=3165) | 1.439E-08 | 14 | STAT3, MEK1(MAP2K1), Shc, CBP, GRB2, JAK1, HIF1A, H-Ras, ERK1/2, FAK1, VEGF-A, c-Raf-1, HDAC1, SOS |
| 84 | [Stem cells_Role of TGF-beta 1 in fibrosis development after myocardial infarction](http://portal.genego.com/cgi/imagemap.cgi?id=5961) | 1.508E-08 | 20 | COL1A1, Biglycan, TMSB4X, Collagen Prolyl 4-Hydroxylase, MMP-1, TGF-beta receptor type II, MMP-2, ACTA2, Ac-SDKP, COL1A2, SP1, TIMP2, Thymosin beta-4, SMAD2, Fibronectin, Prolyl endopeptidase, Collagen I, TIMP1, TGF-beta receptor type I, Collagen III |
| 85 | [Role of cell adhesion molecules in progression of pancreatic cancer](http://portal.genego.com/cgi/imagemap.cgi?id=3223) | 1.697E-08 | 22 | MEK1(MAP2K1), E-cadherin, ITGB1, Shc, GRB2, alpha-6/beta-1 integrin, K-RAS, Tcf(Lef), H-Ras, ERK1/2, FAK1, IL-1RI, alpha-2/beta-1 integrin, Beta-catenin, Cyclin D1, c-Raf-1, SOS, Plakoglobin, Collagen IV, Fibronectin, Alpha-catenin, Collagen I |
| 86 | [Mitogenic action of ErbB2 in breast cancer](http://portal.genego.com/cgi/imagemap.cgi?id=6350) | 1.870E-08 | 25 | I-kB, Shc, PI3K reg class IA (p85), RHEB2, GRB2, LMO4, EGFR, H-Ras, TCF7L2 (TCF4), FOXO3A, ERK1/2, ErbB3, JAB1, Beta-catenin, MEK1/2, Cyclin G2, Cyclin D1, c-Raf-1, SOS, PAK1, Cullin 3, p21, PDK (PDPK1), p27KIP1, Rac1 |
| 87 | [Immune response_Antigen presentation by MHC class II](http://portal.genego.com/cgi/imagemap.cgi?id=1700) | 2.063E-08 | 40 | MHC class II alpha chain, Cathepsin L, RhoA, 14-3-3 beta/alpha, IP-30, MHC class II, FCGRT, Rab-7, ARHGEF2, CD74, Dynein 1, cytoplasmic, heavy chain, HSC70, PKC, SPPL2a, Gie1, MyD88, Kinesin heavy chain, AP complex 2 medium (mu) chain, PKC-alpha, MYO1E, Endoplasmin, CLEC10A, LAMP2, ERK1/2, Beclin 1, HSP90 alpha, CDC42, Clathrin, Legumain, HSP90, Kinesin light chain, MHC class II beta chain, PDK (PDPK1), Dynein 1, cytoplasmic, intermediate chains, Cathepsin S, Cathepsin V, p38 MAPK, HSP90 beta, Rac1, Tubulin (in microtubules) |
| 88 | [Cell adhesion_Endothelial cell contacts by junctional mechanisms](http://portal.genego.com/cgi/imagemap.cgi?id=745) | 2.115E-08 | 16 | RAP-1A, Plakophilin 4, Cingulin, AF-6, ZO-1, Connexin 43, Desmoplakin, Occludin, Beta-catenin, Actin cytoskeletal, Alpha-actinin, Plakoglobin, JAM1, Vimentin, Alpha-catenin, ZO-2 |
| 89 | [Transcription_CREB signaling pathway](http://portal.genego.com/cgi/imagemap.cgi?id=409) | 2.146E-08 | 23 | MEK1(MAP2K1), Shc, cPKC (conventional), G-protein alpha-s, Calmodulin, GRB2, PI3K reg class IA, PKC-alpha, PP1-cat, H-Ras, MEK3(MAP2K3), ERK1/2, Cyclin D1, PKA-reg (cAMP-dependent), c-Raf-1, SOS, PP2A catalytic, LDHA, PDK (PDPK1), p38 MAPK, PKA-cat (cAMP-dependent), p90Rsk, Rac1 |
| 90 | [Neurogenesis_NGF/ TrkA MAPK-mediated signaling](http://portal.genego.com/cgi/imagemap.cgi?id=7313) | 2.161E-08 | 37 | RAP-1A, Sequestosome 1(p62), Shc, AP-1, Calmodulin, GRB2, K-RAS, PKC-lambda/iota, SHP-2, N-Ras, H-Ras, MEK3(MAP2K3), c-Jun, ERK1/2, KIDINS220, HB-EGF, CrkL, MEK1/2, EGR1, SGK1, PP2A regulatory, Cyclin D1, Flotillin-1, PKA-reg (cAMP-dependent), c-Raf-1, SOS, PP2A catalytic, SORBS1, DNAJA3 (TID1), SP1, p21, RGS2, RUSC1 (NESCA), p38 MAPK, PKA-cat (cAMP-dependent), p90Rsk, IP3 receptor |
| 91 | [Signal transduction_Angiotensin II/AGTR1 signaling via Notch, Beta-catenin and NF-kB pathways](http://portal.genego.com/cgi/imagemap.cgi?id=436) | 2.394E-08 | 30 | COL1A1, NOTCH1 (NICD), RhoA, E-cadherin, I-kB, CBP, NOTCH1 receptor, PKC, HES1, IL-8, IKK-beta, TCF7L2 (TCF4), ROCK1, Connexin 43, ERK1/2, MMP-2, Beta-catenin, ACTA2, VEGF-A, Cyclin D1, PAK1, ERK2 (MAPK1), RBP-J kappa (CBF1), NOTCH1 (NEXT), PDK (PDPK1), Fibronectin, p38 MAPK, PKA-cat (cAMP-dependent), Rac1, YAP1 (YAp65) |
| 92 | [Regulation of lipid metabolism_Stimulation of Arachidonic acid production by ACM receptors](http://portal.genego.com/cgi/imagemap.cgi?id=2658) | 2.396E-08 | 29 | BETA-PIX, MEK1(MAP2K1), RhoA, Calmodulin, betaAPPs, ADAM9, PKC, alphaAPPs, PKC-alpha, Monoglyceride lipase, MEK3(MAP2K3), ERK1/2, G-protein alpha-11, ARF6, G-protein beta/gamma, CDC42, G-protein alpha-q, c-Raf-1, G-protein alpha-i3, PAK1, APP, ARF1, ADAM10, LPP1, p38 MAPK, LPP3, Rac1, IP3 receptor, G-protein alpha-13 |
| 93 | [IL-6 signaling in breast cancer cells](http://portal.genego.com/cgi/imagemap.cgi?id=6411) | 2.555E-08 | 24 | STAT3, E-cadherin, Shc, gp130, MUC1, GRB2, PI3K reg class IA, JAK1, C/EBPbeta, SHP-2, H-Ras, ERK1/2, JAB1, Bcl-XL, MEK1/2, Cyclin D1, c-Raf-1, SOS, Jagged1, Vimentin, Mcl-1, Carbonic anhydrase IX, STAT1, C/EBPdelta |
| 94 | [EGFR signaling pathway in lung cancer](http://portal.genego.com/cgi/imagemap.cgi?id=5158) | 2.555E-08 | 24 | STAT3, COX-2 (PTGS2), Shc, PI3K reg class IA (p85), gp130, GRB2, PTEN, HIF1A, EGFR, c-Jun, ERK1/2, ErbB3, Bcl-XL, EGR1, VEGF-A, Cyclin D1, SOS, SP1, PDK (PDPK1), HGF receptor (Met), Mcl-1, Carbonic anhydrase IX, NFKBIA, CXCR4 |
| 95 | [Development_G-protein-mediated regulation of MAPK-ERK signaling](http://portal.genego.com/cgi/imagemap.cgi?id=463) | 2.832E-08 | 22 | MEK1(MAP2K1), RAP-1A, Shc, G-protein alpha-12 family, G-protein alpha-s, Calmodulin, GRB2, G-protein alpha-i family, H-Ras, Rap1GAP1, G-protein beta/gamma, PKA-reg (cAMP-dependent), c-Raf-1, SOS, ERK2 (MAPK1), G-protein alpha-q/11, RASA2, GMF, ERK1 (MAPK3), SynGAP, PKA-cat (cAMP-dependent), IP3 receptor |
| 96 | [Neurophysiological process_Receptor-mediated axon growth repulsion](http://portal.genego.com/cgi/imagemap.cgi?id=527) | 2.832E-08 | 22 | RhoA, RAP-1A, ROCK, ROCK2, EGFR, Destrin, F-Actin cytoskeleton, LARG, Arp2/3, HB-EGF, Cortactin, CDC42, Actin cytoskeletal, Fyn, CRMP2, c-Raf-1, LIMK2, PAK1, Ephrin-A, Cofilin, Rac1, Tubulin (in microtubules) |
| 97 | [Transcription_Androgen Receptor nuclear signaling](http://portal.genego.com/cgi/imagemap.cgi?id=2202) | 2.832E-08 | 22 | STAT3, MEK1(MAP2K1), Shc, GRB2, WNT, TGF-beta receptor type II, EGFR, H-Ras, MMP-2, Beta-catenin, N-CoR, Cyclin D1, c-Raf-1, SOS, ERK2 (MAPK1), p21, NCOA2 (GRIP1/TIF2), Dsh, PKA-cat (cAMP-dependent), Frizzled, TGF-beta receptor type I, VIL2 (ezrin) |
| 98 | [Immune response_M-CSF-receptor signaling pathway](http://portal.genego.com/cgi/imagemap.cgi?id=552) | 3.309E-08 | 31 | STAT3, Cyclin D2, MEK1(MAP2K1), RhoA, Shc, PI3K reg class IA (p85), p120GAP, AP-1, Calmodulin, MAP3K2 (MEKK2), PKC, GRB2, JAK1, Tcf(Lef), ETS1, H-Ras, c-Jun, ERK1/2, YES, ETS2, Beta-catenin, CDC42, WASP, Fyn, Cyclin D1, c-Raf-1, PDK (PDPK1), PLAU (UPA), STAT1, Rac1, IP3 receptor |
| 99 | [Transcription_Negative regulation of HIF1A function](http://portal.genego.com/cgi/imagemap.cgi?id=7293) | 3.437E-08 | 28 | Ubiquitin, RACK1, MCM3, Casein kinase I delta, FHL1 (SLIM1), Sirtuin3, HSC70, FHL2, PTEN, PRDX2, HIF1A, SSAT, LAMP2, Elongin C, OS-9, HSP40, HIF-prolyl hydroxylase, VCP, MCM2, PSMA7, HSP90, PRDX4, CHIP, HSP70, SKP1, TCP1, HSP90 beta, EGLN1 |
| 100 | [Regulation and signaling of HGF receptor (Met) and MSP receptor (RON) in lung cancer](http://portal.genego.com/cgi/imagemap.cgi?id=6025) | 3.457E-08 | 29 | STAT3, COX-2 (PTGS2), p38alpha (MAPK14), Shc, PI3K reg class IA (p85), AP-1, Rb protein, GRB2, K-RAS, PKC-alpha, HIF1A, C/EBPbeta, H-Ras, MEK3(MAP2K3), c-Jun, ERK1/2, MMP-2, FAK1, CrkL, Beta-catenin, VEGF-A, CDC42, SOS, SP1, PDK (PDPK1), HGF receptor (Met), p90Rsk, Rac1, Gamma adducin |

| **Supplementary Table 3.** Quantitative data in cDNA microarray analysis of five patients with ampullary cancer. The log2 ratio of gene expression comparing ampullary cancer and normal duodenum cells is calculated. Increased expression of the *TGFB1* gene is detected in ampullary cancer. | | | |
| --- | --- | --- | --- |
| Gene | Log2 ratio of gene expression in ampullary cancer/normal duodenum | | |
| Mean | Median | Range |
| *TGFB1* | 0.319 | 0.319 | 0.137 – 0.479 |
| *CSF1* | -0.074 | -0.083 | -0.207 – -0.002 |
| *IL10* | -0.046 | -0.052 | -0.273 – 0.154 |
| Abbreviations: cDNA, complementary deoxyribonucleic acid; *CSF1*, colony stimulating factor 1; *IL10*, interleukin-10; *TGFB1*, transforming growth factor beta 1. | | | |

**Supplementary Figure 1.** Serum TGF-β is detected using ELISA. (A) Comparison between patients with benign hyperplasia and those with ampullary cancer. The median serum TGF-β concentration is slightly higher in patients with ampullary cancer. (B) Comparison between healthy controls, patients with benign hyperplasia, and patients with AJCC TNM stage I, stage II, or stage III ampullary cancer. After healthy controls and patients with benign hyperplasia are excluded, serum TGF-β concentration is compared for (C) different tumor stages, (D) with or without lymph node metastasis, and (E) well, moderate, or poor differentiation.


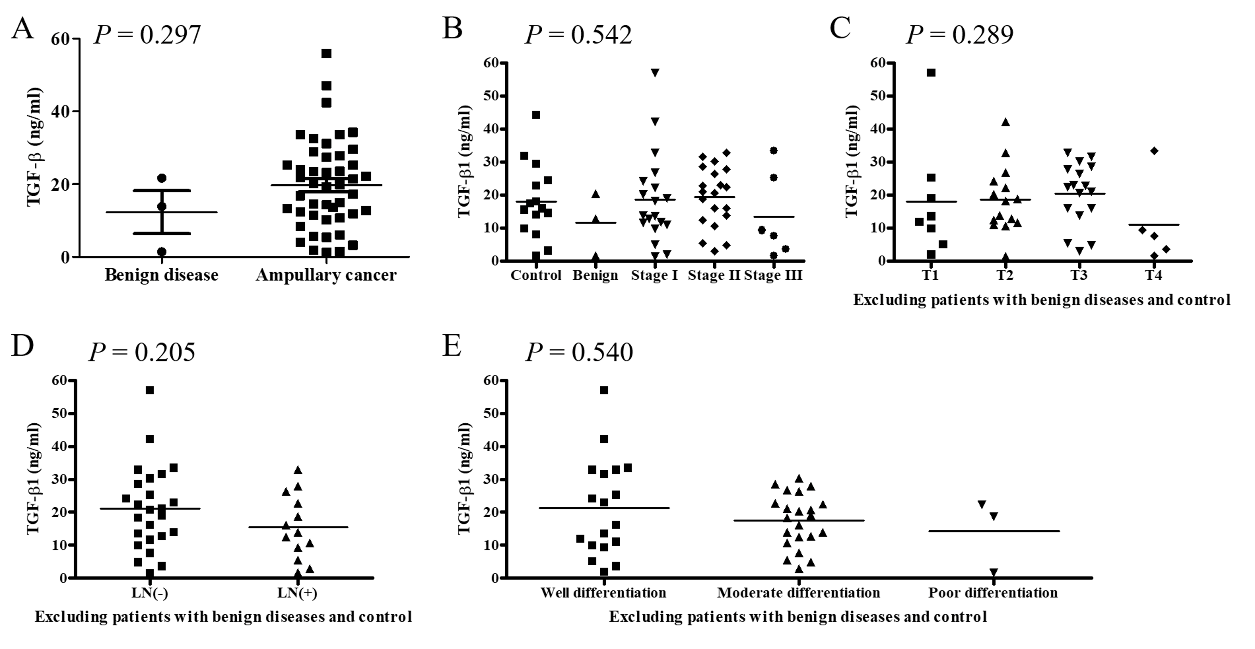
Abbreviations: AJCC TNM stage, American Joint Committee on Cancer’s tumor, node, and metastasis staging system; ELISA, enzyme-linked immunosorbent assay; LN, lymph node; TGF-β, transforming growth factor beta.
